# Supplementary material for: Predictors of SIV recrudescence following antiretroviral treatment interruption
Source: eLife. 2019 Oct 25;8:e49022. doi: 10.7554/eLife.49022 (PMC6917497; doi:10.7554/eLife.49022)
Supplement: Figure 1—source data 1. [file elife-49022-fig1-data1.xlsx]

## Sheet: Figure 1a
Fig 1a.The Viral load in individual animals infected with SIVmac239M, treated on day 4
DPI	DEJX	DFGV	DEJW	H090	DEPI	H105
	VL (c/ml)
0	14	14	14	14	14	14
4	89000	150000	84000	72000	33000	910000
10	54000	46000	150000	140000	38000	760000
13	5600	11000	20000	43000	7600	110000
17	2900	4400	9400	18000	5000	8900
20	2200	300	7100	5300	5400	5200
24	710	30	590	400	1300	3700
34	15	14	15	14	14	110
41	15	14	30	40	14	30
47	14	14	14	14	14	70
53	14	14	14	14	14	40
67	14	14	14	14	14	15
81	14	14	14	15	14	15
95	14	14	14	14	14	14
110	14	14	14	14	14	15
123	14	14	14	14	14	15
139	14	14	14	14	14	14
153	14	14	14	14	14	14
171	14	14	14	14	14	14
185	14	14	14	14	14	14
199	14	14	14	14	14	14
213	14	14	14	14	14	14
241	14	14	14	14	14	14
255	14	14	14	14	14	14
269	14	14	14	14	14	30
283	14	14	14	14	14	14
298			14	14	14
300	14	14				14
305	14	14
308	14	14
312	14	14
313			14	14	14	14
314	120	14
318	56000	14
321	230000	180
325	160000	26000	14	14	14	14
328	120000	2700000
332	190000	870000
335		23000
339	53000	18000
341			14	14	14	14
342	150000	180000
347	160000	140000
349	180000	190000
355	15000	13000	14	14	14	14
362	110000	160000
369	31000	55000	14	14	14	14
375			14	14
377	5700	40000
378			14	14
382			14	210
383	19000	53000			14	14
384			15	3300
388	15000	46000
389			28000	390000
396			200000	110000
397	12000	47000			14	14
403			350000	290000
404	17000	24000
409			160000	120000
410	19000	70000
412					14	14
417	10000	35000	170000	32000
423	6900	76000	250000	30000
424					14	14
430	7500	67000	330000	73000
438	6700	130000	370000	190000
439					14	14
446	8700	120000	310000	340000
453	12000	190000	530000	270000
459	13000	400000	570000	550000
466	11000	490000	1200000	590000
467					14	14
475	17000	580000	2100000	1000000	14	14
480	11000	470000	1200000	900000
482					14	14
486					14	14
487	19000	1100000	2400000	1100000
489					14	540
493					70	770000
494	25000	1800000	2300000	1500000
496					6800	1200000
500	39000	1500000	3600000	2900000	490000	1500000
503					28000	1500000
507	28000	1900000	2800000	3900000	300000	1200000
510					280000	550000
514	20000	1100000	2600000	2900000	240000	390000
517					220000	460000
524	55000	2900000	3300000	5300000	240000	520000
531					320000	110000
538	47000	2800000	3300000	3000000	260000	57000
545	50000	4400000	3200000	2500000	290000	86000
558	67000	4300000	2200000	3700000	270000	58000
572	120000	3800000	1900000	2900000	280000	32000
586	48000	3600000	2700000	2200000	280000	46000
601	93000	3400000	1700000	2000000	990000	24000
615	150000	6100000	6000000	5000000	3100000	32000
629	190000	5400000			2000000	31000
636	230000	5000000

## Sheet: Figure 1b
Fig 1b.The Viral load in individual animals infected with SIVmac239M, treated on day 10
DPI	DFR6	H34G	H814	H860
	VL (c/ml)
0	14	14	14	14
4	9900	1600	2500	2700
7	1000000	510000	290000	310000
10	17000000	22000000	16000000	5800000
13	13000000	26000000	13000000	12000000
18	120000	90000	39000	260000
25	2400	1500	1500	3400
33	1500	420	230	65
39	250	240	65	160
47	370	40	140	25
53	200	25	25	65
60	250	14	14	25
67	40	15	65	14
74	130	14	14	14
81	25	80	15	15
88	14	14	40	14
96	15	14	25	14
102	15	14	40	14
109	14	40	15	15
116	15	15	14	25
123	25	14	15	14
130	14	25	25	14
138	25	14	14	14
144	14	14	14	14
151	14	15	14	14
158	14	14	14	15
165	65	14	14	14
172	14	14	14	14
179	15	14	14	14
186	14	14	14	14
193	14	15	14	14
201	14	14	14	14
216	14	14	15	14
223	14	14	14	14
230	14	14	14	14
237	14	14	14	14
243	14	14	15	14
250	15	15	15	14
257	14	14	14	14
264	14	14	14	14
271	14	14	14	14
278	15	14	25	14
285	15	14	14	14
299	14	14	14	14
306	14	14	14	14
313	14	14	14	14
318	14	14	14	14
320	14	14	14	14
322	40	14	14	14
327	24000	1300	870	65
329	49000	7200	8800	960
332	9000	9000	21000	930
334	3100	18000	55000	2600
336	65	6200	18000	740
339	15	65	1200	65
342	14	15	40	15
346	14	14	14	14

## Sheet: Figure 1c
Fig 1c.The Viral load in individual animals infected with SIVmac239M, treated on day 27
DPI	DEVW	DEVX	ZJ15	DEVJ	H106
	VL (c/ml)
0	14	14	14	14	14
5	130000	690000	490000	310000	280000
7	2600000	110000	6600000	8400000	4200000
10	51000000	63000000	180000000	38000000	17000000
13	21000000	4600000	11000000	10000000	11000000
17	13000000	16000000	17000000	11000000	10000000
20	3000000	4400000	4100000	1700000	1100000
24	820000	1800000	1000000	900000	1300000
27	500000	840000	350000	480000	370000
31	14000	19000	15000	20000	9300
34	4400	4700	4100	5400	2300
38	1200	2200	900	1300	1400
41	520	1200	570	770	630
45	460	790	560	510	630
55	210	150	70	200	240
62	90	290	200	310	230
68	70	240	300	160	270
74	40	40	120	180	40
88	15	15	15	70	80
102	15	40	15	15	40
116	15	40	30	30	14
131	14	14	15	40	15
144	14	14	14	14	14
160	14	15	14	30	100
174	14	14	30	15	14
192	14	14	14	150	14
206	14	14	14	14	30
220	14	20	14	14	14
234	14	14	14	14	14
262	14	15	14	15	14
276	15	15	14	25	40
290	14	14	14	14	14
304	14	14	15	14	40
318	14	14	14	14	14
334	14	14	14	70	14
346	15	14	14	40	14
349	14
353	14
356	14
360	14
362		15	14	14	14
363	25
368	170
370	1100
374	2800
376		14	14	14	14
377	13000
381	6600
384	5400
388	1700
390		14	14	14	14
391	1900
395	740
396		14	14
398	65
399		14	14
402	2700
403		14	14
404				14	14
405	2700	30	14
409	2300
410		65	14
417		250	360
418	1600			14	14
424		70	1000
425	2100
430		180	570
431	2800
433				14	14
438	2400	25	1000
444	2200	230	70
445				15	15
451	3000	290	40
459	2100	460	14
460				14	25
467	3400	1100	100
474	5200	2000	40
480	7800	2500	65
487	3800	7200	25
488				14	15
496	11000	7600	15	40	14
501	11000	8000	14
503				14	14
507				30	14
508	8700	6200	110
510				450	15
514				27000	65
515	13000	11000	40
517				85000	190
521	17000	30000	260	170000	2100
524				140000	11000
528	18000	30000	780	67000	13000
531				24000	6100
535	19000	26000	250	14000	1700
538				35000	2400
545	30000	63000	250	23000	4000
552				36000	2800
559	45000	83000	70	49000	2500
566	49000	81000	70	95000	4000
579	82000	120000	65	140000	4900
593	94000	110000	40	370000	2800
607	59000	200000	40	320000	19000
622	120000	150000	14	390000	15000
636	310000	170000	1200	990000	3000
650	170000	170000	25	750000	22000

## Sheet: Figure 1d
Fig 1d. Frequency of clonotypes identified by high throughput sequencing of plasma virus in individual monkeys
Day 4 Treated							Day 10 Treated					Day 27 Treated
DEJX	DFGV	DEJW	HO90	DEPI	H105		DFR6	H34G	H814	H860		DEVW	DEVX	ZJ15	DEVJ	H106
Proportions of barcodes
1	1	1	1	1	1		1	1	1	1		1	1	1	1	1
0.00893	0.101921	0.0710966	0.166644	0.012373	0.014064		0.262737	0.73457	0.276074	0.203753		0.6	0.6	0.555556	0.003346	0.285553
0.004278	0.012372	0.00251186	0.007552	0.000242	0.001332		0.09079	0.451299	0.170699	0.120802		0.233333		0.333333	0.002409	0.15784
	0.002989		0.001851	1.15e-05	1.49e-05		0.068508	0.178118	0.105867	0.112295		0.2		0.222222	0.002125	0.079888
			0.001129				0.054625	0.138609	0.062233	0.091441		0.133333			0.001823	0.049325
			0.000375				0.02907	0.106902	0.054616	0.086674		0.133333			0.001338
							0.009979	0.097816	0.025631	0.056981		0.1			0.001164
							0.005065	0.097763	0.02477	0.040642		0.1			0.001003
							0.004652	0.058339	0.014375			0.1			0.000672
							0.004192	0.055448				0.066667			7.09e-05
							0.003768	0.053461							6.11e-05
							0.003613	0.051939
							0.002934	0.050746
							0.00195	0.039795
							0.001208	0.039538
							0.001099	0.024992
							0.000821	0.021555
							0.000696	0.019719
							0.00046	0.016685
							0.000413	0.010038
							0.000371	0.000338
							0.000208	4.76e-05
							1.51e-05	9.51e-06
							5.03e-06

## Sheet: Figure 1f
Fig 1f. The frequency of reactivation for the three cohorts initiating treatment on different days post infection
ID	d4	d10	d27
	Reactivation rate
DEJX	0.563367
DFGV	0.79875
DEJW	0.50324
HO90	0.872874
DEPI	0.402253
H105	0.489988
DFR6		2.41213
H34G		1.62835
H814		2.18186
H860		2.94226
DEVW			3.10286
DEVX			0.745988
ZJ15			0.925213
DEVJ			1.05492
H106			0.798407

## Sheet: Figure 1g
Fig 1g. The frequency of reactivation for the three cohorts treated for different lengths of time
ID	Duration of treatment	d4	d10	d27
		Reactivation rate
DEJX	301	0.563367
DFGV	301	0.79875
DEJW	370	0.50324
HO90	370	0.872874
DEPI	478	0.402253
H105	478	0.489988
DFR6	310		2.41213
H34G	310		1.62835
H814	310		2.18186
H860	310		2.94226
DEVW	322			3.10286
DEVX	369			0.745988
ZJ15	369			0.925213
DEVJ	476			1.05492
H106	476			0.798407
