# Supplementary material for: Predictors of SIV recrudescence following antiretroviral treatment interruption
Source: eLife. 2019 Oct 25;8:e49022. doi: 10.7554/eLife.49022 (PMC6917497; doi:10.7554/eLife.49022)
Supplement: Figure 2—source data 1. [file elife-49022-fig2-data1.xlsx]

## Sheet: Figure 2a
Fig 2a. The levels of cell associated SIV DNA in individual animals
	d4						d10				d27
DPI	DEJX	DFGV	DEJW	H090	DEPI	H105	DFR6	H34G	H814	H860	DEVW	DEVX	ZJ15	DEVJ	H106
	SIV DNA copies / 106 PBMC
4	240	200	160	240	130	1400
24	130	59	65	140	12	240
53	52	19	18	45	6.1	150
95	37	35	11	50	7.2	76
139	7.8	3.1	6.8	4.2	1.5	22
185	11	21	2.4	2.4	1.5	6.3
241	2.9	3.1	9.1	3.3	2.9	17
283	7	3.1	2.8	11	3.2	11
313			3.2	3.1	3.5	110
375			3	3.6
383					3.5	29
424					3.2	6.1
467					3.2	5.7
10							130000	210000	130000	11000
39							1100	1600	1400	1100
67							570	920	900	510
95							450	730	570	430
123							710	950	890	570
151							530	870	720	590
179							520	850	400	320
216							240	320	290	220
264							500	1000	450	530
313							420	690	630	580
10											110000	136000	185000	72600	82100
24											7210	9290	13400	22200	39800
62											1910	1290	4210	4610	9390
102											1760	1340	2540	3630	4830
144											1130	900	1840	2440	1910
192											867	682	1150	1730	1220
234											809	538	876	1680	994
290											726	434	492	1650	1280
346											776	229	419	1300	839
404														1080	731
460														712	348
	* Yellow cells - values are entered as the detection threshold

## Sheet: Figure 2b
Fig 2b. The relationship between frequency of reactivation from latency and SIV DNA levels at cART interruption, for individual animals treated at different times after infection
ID	DNA at interruption (copies / 10^6 PBMC )	d4	d10	d27
		Reactivation rate
DEJX	7	0.563367
DFGV	3.1	0.79875
DEJW	3	0.50324
HO90	3.6	0.872874
DEPI	3.2	0.402253
H105	5.7	0.489988
DFR6	500		2.41213
H34G	1000		1.62835
H814	450		2.18186
H860	530		2.94226
DEVW	776			3.10286
DEVX	229			0.745988
ZJ15	419			0.925213
DEVJ	712			1.05492
H106	348			0.798407
		* Yellow cell - value is entered as the detection threshold

## Sheet: Figure 2c
Fig 2c. The frequency of reactivation per DNA copy for animals treated on different days post-infection
ID	d4	d10	d27
	Reactivation rate/SIV DNA
DEJX	0.080481
DFGV	0.257661
DEJW	0.167747
HO90	0.242465
DEPI	0.125704
H105	0.085963
DFR6		0.00482
H34G		0.00163
H814		0.00485
H860		0.00555
DEVW			0.00399853
DEVX			0.00325759
ZJ15			0.00220814
DEVJ			0.00148163
H106			0.00229427
	* Yellow cell - the SIV DNA value is below the detection threshold

## Sheet: Figure 2d
Fig 2d. the relationship between duration of treatment and reactivation per DNA copy
ID	day post initiation of treatment	d4	d10	d27
		Reactivation rate/SIV DNA
DEJX	301	0.08048
DFGV	301	0.25766
DEJW	370	0.16775
HO90	370	0.24247
DEPI	478	0.1257
H105	478	0.08596
DFR6	310		0.00482
H34G	310		0.00163
H814	310		0.00485
H860	310		0.00555
DEVW	322			0.00399853
DEVX	369			0.00325759
ZJ15	369			0.00220814
DEVJ	476			0.00148163
H106	476			0.00229427
		* Yellow cell - the SIV DNA value is below the detection threshold
