# Supplementary material for: Predictors of SIV recrudescence following antiretroviral treatment interruption
Source: eLife. 2019 Oct 25;8:e49022. doi: 10.7554/eLife.49022 (PMC6917497; doi:10.7554/eLife.49022)
Supplement: Figure 3—source data 1. [file elife-49022-fig3-data1.xlsx]

## Sheet: Figure 3a
Fig 3a. The levels of cell associated SIV RNA were measured over time in peripheral blood
DPI	d4						d10				d27
	DEJX	DFGV	DEJW	H090	DEP	H105	DFR6	H34G	H814	H860	DEVW	DEVX	ZJ15	DEVJ	H106
	CA RNA copies / 106 PBMC
4	23000	43000	19000	80000	3000	250000
24	45	23	45	48	12	1000
53	3.4	2.9	2.7	10	2.9	12
95	4.2	4.1	11	3.3	7.2	5
139	1.6	3.1	3.2	1.2	1.5	1.4
185	3.4	1.4	2.4	2.4	1.5	1.3
241	2.9	3.1	2.7	3.3	2.9	7.3
283	3.3	3.1	2.8	3.3	3.2	27
313			3.2	3.1	3.5	2.4
375			3	3.6
383					3.5	3.3
424					3.2	6.1
467					3.2	2.7
10							6400000	14000000	2700000	440000
39							11	35	45	31
67							12	75	6.7	3.2
95							10	230	12	16
123							54	34	120	14
151							26	280	180	120
179							110	120	21	60
216							17	280	19	120
313							25	31	2.6	10
342							13	42	10	7.7
10											13353190	36593890	40809320	17373430	12715160
24											279282	913295	74011.2	1260527	762953
62											1877.8	1473.4	4608.3	3113.4	2352.7
102											852.9	424.6	1197.2	785.6	439.6
144											202.1	312.8	304.7	502	422
192											188.7	90.8	224.3	505.4	242.1
234											99.5	11.1	174.5	174.6	124.6
290											760.6	68.1	41.7	1009.9	404.5
346												376.4	42.6	1957.4	482.3
404														1418.7	28.1
460														332.3	72.7
	* Yellow cells - values are entered as the detection threshold

## Sheet: Figure 3b
Fig 3b. The relationship between frequency of reactivation from latency and SIV RNA levels at interruption for individual animals treated at different times after infection
ID	CA RNA at interruption (copies / 10^6 PBMC)	d4	d10	d27
		Reactivation rate
DEJX	3.3	0.563368
DFGV dt	3.1	0.79875
DEJW dt	3	0.50324
HO90 dt	3.6	0.872874
DEPI dt	3.2	0.402253
H105 dt	2.7	0.489988
DFR6	25		2.41213
H34G	31		1.62835
H814	2.6		2.18186
H860	10		2.94226
DEVW	496.6			3.10286
DEVX	376.4			0.745988
ZJ15	42.6			0.925213
DEVJ	332.3			1.05492
H106	72.7			0.798407
	* Yellow cells - values are entered as the detection threshold

## Sheet: Figure 3c
Fig 3c The frequency of reactivation per RNA copy for animals treated on different days post-infection, according to the duration of treatment.
ID	duration of treatment	d4	d10	d27
		Reactivation rate per CA RNA copy
DEJX	301	0.17072
DFGV	301	0.25766
DEJW	370	0.16775
HO90	370	0.24247
DEPI	478	0.1257
H105	478	0.18148
DFR6	310		0.09649
H34G	310		0.05253
H814	310		0.83918
H860	310		0.29423
H105 dt
DEVW	322			0.00625
DEVX	369			0.00198
ZJ15	369			0.02172
DEVJ	476			0.00317
H106	476			0.01098
	* Yellow cells - the CA RNA values are below the detection threshold

## Sheet: Figure 3d
Fig 2d. Immune activation assessed based on expression of Ki67 in CD4+ T cells.
d4		d10		d27
ID	%Ki67+	ID	%Ki67+	ID	%Ki67+
DEJX	1.95	DFR6	7.46	DEVW	2.38
DFGV	0.99	H34G	4.59	DEVX	1.88
DEJW	0.81	H814	3.76	ZJ15	1.3
HO90	0.96	H860	2.35	DEVJ	1.39
DEPI	0.95			H106	1.63
H105	1.06

## Sheet: Figure 3e
Fig 3e. Reactivation per SIV DNA vs. expression of Ki67 marker
ID	T4:Ki67+	d4	d10	d27
	Reactivation rate per SIV DNA copy
DEJX	1.95	0.08048
DFGV	0.99	0.25766
DEJW	0.81	0.16775
HO90	0.96	0.24247
DEPI	0.95	0.1257
H105	1.06	0.08596
DFR6	7.46		0.00482
H34G	4.59		0.00163
H814	3.76		0.00485
H860	2.35		0.00555
DEVW	2.38			0.00399853
DEVX	1.88			0.00325759
ZJ15	1.3			0.00220814
DEVJ	1.39			0.00148163
H106	1.63			0.00229427
		* Yellow cell - the SIV DNA values is below the detection threshold
