# Supplementary material for: Predictors of SIV recrudescence following antiretroviral treatment interruption
Source: eLife. 2019 Oct 25;8:e49022. doi: 10.7554/eLife.49022 (PMC6917497; doi:10.7554/eLife.49022)
Supplement: Figure 4—figure supplement 3—source data 1. [file elife-49022-fig4-figsupp3-data1.xlsx]

## Sheet: Supplementary Figs 1,2,3
Figure 4 – figure supplement 3. Relationship between reactivation rate at time of interruption and the level of immune response to different peptides.
ID	SIV Peptide	Immune response					Reactivation rate/day
		CD107a	TNF alpha	INF gamma	IL2	MIP1b
day 4
DEJX	SIV ACCp	0	0	0	0	0	0.563367
DFGV		0.12	0	0	0	0	0.79875
DEJW		0	0	0.05	0.04	0	0.50324
HO90		0	0	0	0	0	0.872874
DEPI		0	0	0.02	0	0	0.402253
H105		0	0	0	0	0	0.489988
DEJX	SIV GAGp	0	0	0	0	0	0.563367
DFGV		0.04	0	0	0	0	0.79875
DEJW		0	0.02	0.01	0	0	0.50324
HO90		0	0	0.06	0	0	0.872874
DEPI		0	0.13	0.02	0	0	0.402253
H105		0.04	0.04	0.01	0.01	0	0.489988
DEJX	SIV POLp	0	0	0	0	0	0.563367
DFGV		0	0	0	0	0	0.79875
DEJW		0	0	0.04	0	0	0.50324
HO90		0	0	0	0	0	0.872874
DEPI		0	0.03	0	0	0	0.402253
H105		0	0	0	0.02	0	0.489988
DEJX	SIV ENVp	0	0	0	0.01	0	0.563367
DFGV		0	0	0.01	0	0	0.79875
DEJW		0	0	0.01	0	0	0.50324
HO90		0	0.15	0.17	0.02	0.2	0.872874
DEPI		0	0.05	0	0	0	0.402253
H105		0	0	0	0.06	0	0.489988
DEJX	pooled	0	0	0	0.01	0	0.563367
DFGV		0.16	0	0.01	0	0	0.79875
DEJW		0	0.02	0.11	0.04	0	0.50324
HO90		0	0.15	0.23	0.02	0.2	0.872874
DEPI		0	0.21	0.04	0	0	0.402253
H105		0.04	0.04	0.01	0.09	0	0.489988
day 10
DFR6	SIV ACCp	0.315	0.05	0.215	0	0	2.41213
H34G		0.565	0.08	0.04	0	0.18	1.62835
H814		0.445	0.07	0.05	0.065	0	2.18186
H860		0	0	0.01	0.02	0	2.94226
DFR6	SIV ENVp	1.37	0.03	0.105	0.035	0	2.41213
H34G		0.315	0.01	0	0	0.18	1.62835
H814		0.535	0.01	0	0	0	2.18186
H860		0	0	0	0.005	0	2.94226
DFR6	SIV GAGp	0.025	0	0.025	0.255	0.02	2.41213
H34G		0.115	0	6.93889e-18	0.145	0.03	1.62835
H814		0.055	0.02	0.02	0.05	0	2.18186
H860		0.085	0.015	0.055	0.025	0.06	2.94226
DFR6	SIV POLp	0	0	0	0.005	0	2.41213
H34G		0.015	0	0	0.045	0	1.62835
H814		0	0.02	0	0	0	2.18186
H860		0	0	0	0.045	0	2.94226
DFR6	pooled	1.71	0.08	0.345	0.295	0.02	2.41213
H34G		1.01	0.09	0.04	0.19	0.39	1.62835
H814		1.035	0.12	0.07	0.115	0	2.18186
H860		0.085	0.015	0.065	0.095	0.06	2.94226
day 27
DEVW	SIV ACCp	0	0.09	0.06	0	0.08	3.10286
DEVX		0.11	0	0.02	0.01	0	0.745988
ZJ15		0	0.07	0.08	0	0	0.925213
DEVJ		0.06	0.03	0	0	0.04	1.05492
H106		0.36	0.07	0.05	0	0	0.798407
DEVW	SIV GAGp	0.16	0.07	0.05	0	0.15	3.10286
DEVX		0.74	0.16	0.14	0.03	0.06	0.745988
ZJ15		0	0	0	0	0	0.925213
DEVJ		0	0.01	0	0	0	1.05492
H106		0.02	0.04	0.04	0	0.07	0.798407
DEVW	SIV POLp	0.29	0	0	0.08	0	3.10286
DEVX		0.38	0.03	0.01	0.03	0	0.745988
ZJ15		0.23	0.04	0.02	0	0	0.925213
DEVJ		0	0	0	0	0	1.05492
H106		0	0	0.03	0	0	0.798407
DEVW	SIV ENVp	0.12	0	0	0.05	0	3.10286
DEVX		0	0.04	0	0.05	0	0.745988
ZJ15		0	0	0	0.21	0	0.925213
DEVJ		0.01	0.01	0.02	0	0	1.05492
H106		0	0	0	0	0	0.798407
DEVW	pooled	0.57	0.16	0.11	0.13	0.23	3.10286
DEVX		1.23	0.23	0.17	0.12	0.06	0.745988
ZJ15		0.23	0.11	0.1	0.21	0	0.925213
DEVJ		0.07	0.05	0.02	0	0.04	1.05492
H106		0.38	0.11	0.12	0	0.07	0.798407
