# Supplementary material for: Predictors of SIV recrudescence following antiretroviral treatment interruption
Source: eLife. 2019 Oct 25;8:e49022. doi: 10.7554/eLife.49022 (PMC6917497; doi:10.7554/eLife.49022)
Supplement: Figure 4—source data 1. [file elife-49022-fig4-data1.xlsx]

## Sheet: Figure 4a
Fig 4a The kinetics of the CD107a+ response in CD8+ T cells to pooled SIV peptides was measured in vitro using ICS (the sum of the responses to peptides from SIV ENV, GAG, POL and accessory (ACC) proteins is shown).
	d4						d10				d27
DPI	DEJX	DFGV	DEJW	H090	DEPI	H105	DFR6	H34G	H814	H860	DEVW	DEVX	ZJ15	DEVJ	H106
	CD107a+ response in CD8+ T cells to pooled SIV peptides
74							2.67	0.36	0.11	0.63
81	0.04	0.15	0.195	0	0.215	0.15					0.115	2.5	0.255	0.19	0.565
300	0	0.15
306							1.83	0.775	0.995	0.045
325											0.56
375			0	0								1.23	0.23
482					0	0.035								0.07	0.38

## Sheet: Figure 4b
Fig 4b. CD8+ T cell responses to pooled peptides (%CD107a+ cells shown)
d4		d10		d27
	CD107a+ response		CD107a+ response		CD107a+ response
DEJX	0	DFR6	1.83	DEVW	0.57
DFGV	0.16	H34G	0.775	DEVX	1.23
DEJW	0	H814	0.995	ZJ15	0.23
HO90	0	H860	0.045	DEVJ	0.07
DEPI	0			H106	0.38
H105	0.04

## Sheet: Figure 4c
Fig 4c. Relationship between peak viral load after treatment interruption and the level of CD107a response to pooled peptides
ID	CD107a+ response in CD8+ T cells to pooled SIV peptides	d4	d10	d27
		Peak VL (c/ml)
DEJX	0	230000
DFGV	0.16	2700000
DEJW	0	350000
HO90	0	390000
DEPI	0	490000
H105	0.04	1500000
DEVW	0.57		13000
DEVX	1.23		250
ZJ15	0.23		1000
DEVJ	0.07		170000
H106	0.38		13000
DFR10	1.71			49000
H34G	1.01			18000
H818	1.04			55000
H864	0.09			2600

## Sheet: Figure 4d
Fig 4d.The dependence of reactivation rate per SIV DNA at time of interruption on the level CD107a response to pooled SIV peptides
	CD107a+ response in CD8+ T cells to pooled SIV peptides	d4	d10	d27
ID		Reactivation rate per SIV DNA copy
DEJX	0	0.080481
DFGV	0.16	0.257661
DEJW	0	0.167747
HO90	0	0.242465
DEPI	0	0.125704
H105	0.04	0.085963
DEVW	0.57		0.0039985
DEVX	1.23		0.0032576
ZJ15	0.23		0.0022081
DEVJ	0.07		0.0014816
H106	0.38		0.0022943
DFR10	1.71			0.00482
H34G	1.01			0.00163
H818	1.04			0.00485
H864	0.09			0.00555
		* Yellow cell - the SIV DNA values is below the detection threshold
