# Supplementary material for: Predictors of SIV recrudescence following antiretroviral treatment interruption
Source: eLife. 2019 Oct 25;8:e49022. doi: 10.7554/eLife.49022 (PMC6917497; doi:10.7554/eLife.49022)
Supplement: Figure 5—source data 1. [file elife-49022-fig5-data1.xlsx]

## Sheet: Figure 5c
Fig 5c. Experimental data
Day of treatment	Reactivation rate as % of average of d27 group						SIV DNA as % of average of d27 group
4	42.503	60.2613	37.9667	65.8536	30.3478	36.9669	0.763859	0.33828	0.305543	1.20035	0.349192	1.20035
10	181.982	122.85	164.61	221.977			56.7438	76.3859	56.7438	64.3824
27	234.094	56.2807	69.8023	79.5877	60.2354		79.223	47.3592	53.6883	180.052	139.677
